# Supplementary material
Source: publisher figshare collection journal article supplement (https://acs.figshare.com/ndownloader/files/5277463)
Supplement: Supplementary file 1 [file 5277463]

## SUPPORTING INFORMATION

# Isotropic and oriented copper nanoparticles supported on graphene as aniline guanylation catalysts

*Sana Frindy<sup>†, τ</sup>, Abdelkrim El Kadib<sup>#</sup>, Mohamed Lahcini<sup>τ</sup>, Ana Primo<sup>\*†</sup> and Hermenegildo García<sup>\*†</sup>*

<sup>†</sup>Instituto de Tecnología Química (CSIC-UPV) and Departamento de Química. (UPV), Universitat Politècnica de València, Av. de los Naranjos s/n, 46022 Valencia, Spain. E-mail addresses: [aprimoar@itq.upv.es](mailto:aprimoar@itq.upv.es) (A.P.) and [hgarcia@qim.upv.es](mailto:hgarcia@qim.upv.es) (H.G.).

<sup>τ</sup> Laboratory of Organometallic and Macromolecular Chemistry-Composites Materials, Faculty of Sciences and Technologies, Cadi Ayyad University, Avenue Abdelkrim Elkhatabi, B.P. 549,40000 Marrakech, Morocco.

<sup>#</sup> Euromed Research Institute, Engineering Division, Euro-Mediterranean University of Fes (UEMF), Fès-Shore, Route de Sidi Hrazem, 30070 Fès, Morocco.

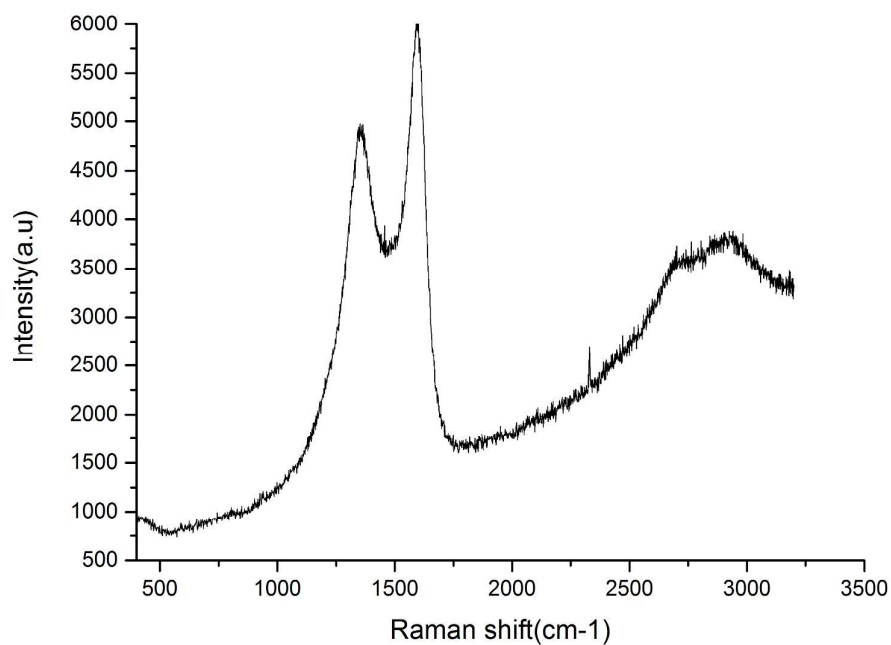

**Figure S1.** Raman spectrum of Cu/G powders recorded upon excitation at 612 nm.

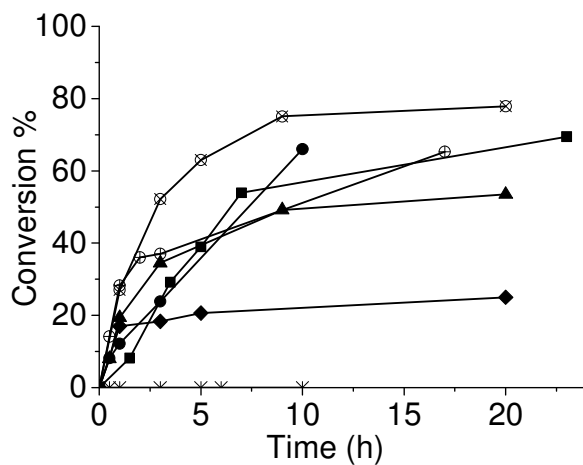

**Figure S2.** Time-conversion plot for the guanylation of aniline with N, N'-diisopropylcarbodiimide catalyzed by Cu/G. \* EDC; ● p-xylene; ▲ dimethyl carbonate; ⊕ Dioxane; ■ DMF; ◆ CH<sub>3</sub>CN; ⊗ Toluene; Reaction conditions: aniline (0.15 mmol), N, N'-diisopropylcarbodiimide (0.24 mmol), catalyst (8 mol %), temperature (150 °C) and solvent (0.5 ml).

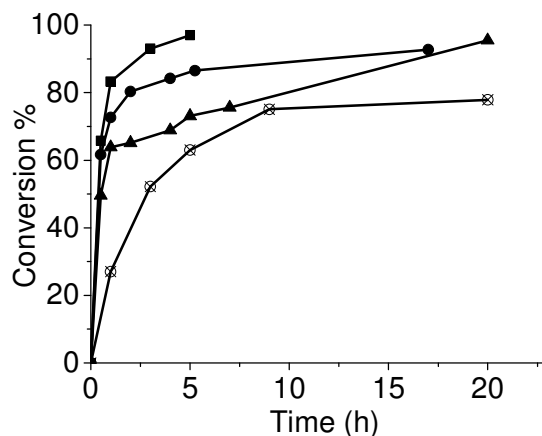

**Figure S3.** Time-conversion plot for the guanylation of aniline by N, N'-diisopropylcarbodiimide as a function of the Cu-to-aniline ratio. ■ 8 mol %; ● 12 mol %; ▲ 6 mol %; ⊗ 4 mol %; Reaction conditions: aniline (0.15 mmol), carbodiimide (0.24 mmol), temperature (150 °C), solvent (0.5 ml).

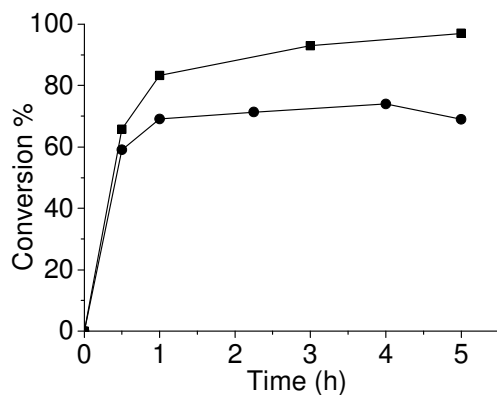

**Figure S4.** Hot filtration test. Comparison of the temporal conversion plot of aniline for guanylation by N, N'-diisopropylcarbodiimide using Cu/G as catalyst. The catalyst was filtered at 30 min reaction time in one of the twin reactions and the mixture without catalyst allowed to react in the absence of Cu/G. ■) normal reaction; ●) hot filtration test; Reaction conditions: catalyst (8 mol %), aniline (0.15 mmol), carbodiimide (0.24 mmol), toluene (0.5 ml), temperature (150 °C).

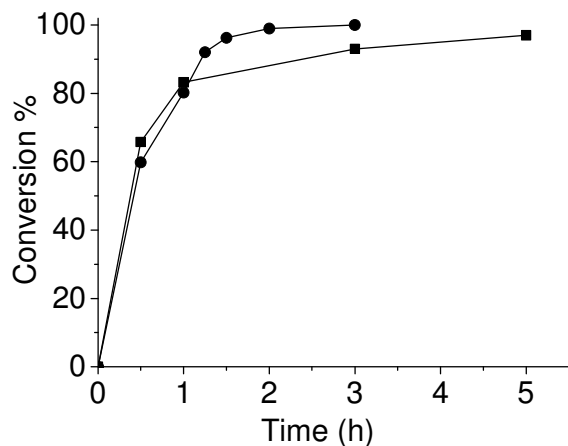

**Figure S5.** Time-conversion plot for aniline guanylation with N, N'-diisopropylcarbodiimide catalyzed by Cu/G. After 1h additional amount of Cu/G was added in one of the runs. ■) Cu/G; ●) Experiment with addition of a supplement of fresh catalyst; Reaction conditions: catalyst (8 mol %), aniline (0.15 mmol), carbodiimide (0.24 mmol), toluene (0.5 ml), temperature (150 °C). In one of the runs a second 1 mol % catalyst was added.

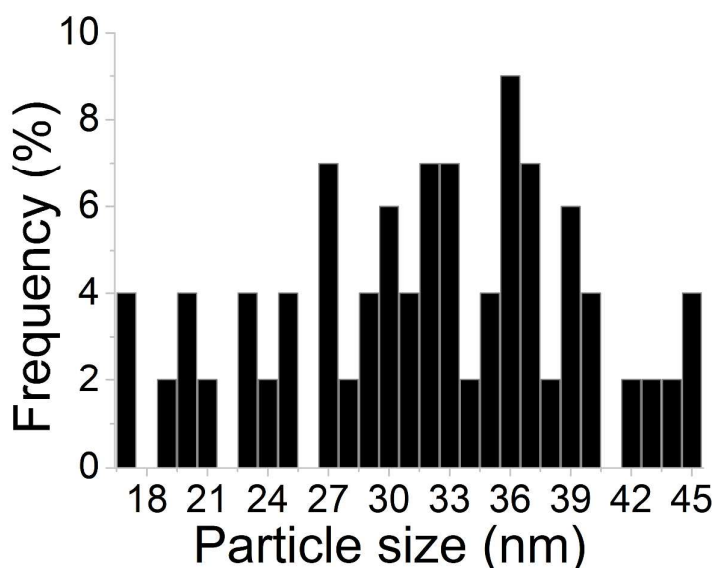

**Figure S6.** Lateral size particle size distribution of oriented Cu nanoplatelets in  $\overline{\text{Cu}}/\text{fl-G}$  films.

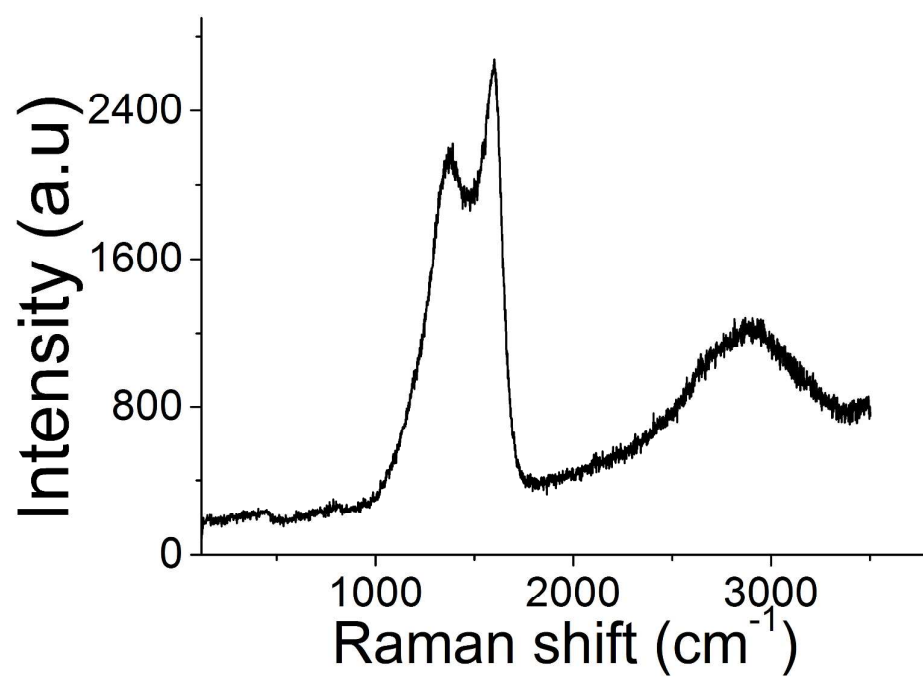

**Figure S7.** Raman spectrum recorded for  $\overline{\text{Cu}}/\text{f1-G}$  films upon excitation at 612 nm.
